# Supplementary material for: Repurposing Approved Drugs for Guiding COVID-19 Prophylaxis: A Systematic Review
Source: PubMed Central journal article supplement (PMC7772842; doi:10.3389/fphar.2020.590598), 2020-12-14
Supplement: datasheet1.pdf [file datasheet1.pdf]

## Supplemental material 1

**Table 1. Search protocol for systematic literature review with the selection and data recovery criteria.**

| <b>Potential antiviral drugs for COVID-19 prophylaxis: A systematic review</b>          |                                                                                                                                                                                                                                                                                                                                                                                                                                                                                                                      |
|-----------------------------------------------------------------------------------------|----------------------------------------------------------------------------------------------------------------------------------------------------------------------------------------------------------------------------------------------------------------------------------------------------------------------------------------------------------------------------------------------------------------------------------------------------------------------------------------------------------------------|
| <b>Repurposing approved drugs for guiding COVID-19 prophylaxis: A systematic review</b> |                                                                                                                                                                                                                                                                                                                                                                                                                                                                                                                      |
| Authors                                                                                 | Bruno Silva Andrade <sup>1</sup> , Fernanda de Souza Rangel <sup>1,2</sup> , Naiane Oliveira Santos <sup>2</sup> , Andria dos Santos Freitas <sup>1,2</sup> , Wagner Rodrigues de Assis Soares <sup>1,3</sup> , Sérgio Siqueira <sup>1</sup> , Aristóteles Góes-Neto <sup>3</sup> , Vasco Ariston de Carvalho Azevedo <sup>4</sup>                                                                                                                                                                                   |
| Description                                                                             | COVID 19 is an ongoing pandemic, caused by the new Severe Respiratory Syndrome, Coronavirus 2 (SARS CoV-2) and presents major challenges in identifying effective drugs for prophylaxis and treatment.                                                                                                                                                                                                                                                                                                               |
| Objective                                                                               | Identify and analyze the main drugs tested in vitro and in vivo and randomized clinical studies on the use of drugs for pre- and post-exposure prophylaxis in the treatment of COVID-19.                                                                                                                                                                                                                                                                                                                             |
| <b>Research question</b>                                                                |                                                                                                                                                                                                                                                                                                                                                                                                                                                                                                                      |
| Question                                                                                | What are the drugs with prophylactic potential against COVID 19, what is their mechanism of action and toxicity?                                                                                                                                                                                                                                                                                                                                                                                                     |
| Control                                                                                 | Available revisions                                                                                                                                                                                                                                                                                                                                                                                                                                                                                                  |
| Expected results                                                                        | Primary studies with empirical experiments that test applications of different drugs with prophylactic potential for the treatment of Covid-19.                                                                                                                                                                                                                                                                                                                                                                      |
| Primary studies                                                                         | Published works with drugs with prophylactic potential undergoing in vitro testing, in vivo or case reports.                                                                                                                                                                                                                                                                                                                                                                                                         |
| <b>Identification of studies</b>                                                        |                                                                                                                                                                                                                                                                                                                                                                                                                                                                                                                      |
| Keywords                                                                                | Covid-19 ou SARS-CoV-2 ou Coronavirus ou 2019 nCoV, prophylaxis, prophylactic, pre-exposure, COVID-19, Sars-Cov-2 Chemoprophylaxis, repurposed, strategies, clinical, trials, anti-sars-cov-2, anti-covid-19, Antiviral, therapy prevention in vitro, in cells e human testing.                                                                                                                                                                                                                                      |
| Drugs used in the search                                                                | Alisporivir, Anisomycin, Benzotropine, Dalbavancin, Homoharringtonine, Oritavancin, Telavancin, Clomipramine, Dasatinib, Emetine, Toremfifene, Cepharanthine, Promethazine, Imatinib, Indomethacin, Tamoxifen, Amodiaquine, Luteolin, Niclosamide, Emodin, Gemcitabine, Ivermectin, Teicoplanin, Mefloquine, Chlorpromazine, Amiodarone, Glycyrrhizin, Nelfinavir, Camostat, BCX4430 (Galidesivir), Ribavirin, Remdesivir, Arbidol (Umifenovir), Lopinavir, Chloroquine, Hydroxychloroquine, umifenovir e Tenofovir. |
| <b>Database / Search Strings</b>                                                        |                                                                                                                                                                                                                                                                                                                                                                                                                                                                                                                      |

**PubMed:**

0. ((((((Covid-19[Title]) OR SARS-CoV-2[Title]) OR Coronavirus[Title]) OR 2019 nCoV[Title]) AND Prophylaxis[Body - All Words]) AND Alisporivir[Body - All Words]) NOT Review[Abstract]
1. ((((((Covid-19[Title]) OR SARS-CoV-2[Title]) OR Coronavirus[Title]) OR 2019 nCoV[Title]) AND Prophylaxis[Body - All Words]) AND Anisomycin[Body - All Words]) NOT Review[Abstract]
2. ((((((Covid-19[Title]) OR SARS-CoV-2[Title]) OR Coronavirus[Title]) OR 2019 nCoV[Title]) AND Prophylaxis[Body - All Words]) AND Benztropine[Body - All Words]) NOT Review[Abstract]
3. ((((((Covid-19[Title]) OR SARS-CoV-2[Title]) OR Coronavirus[Title]) OR 2019 nCoV[Title]) AND Prophylaxis[Body - All Words]) AND Dalbavancin[Body - All Words]) NOT Review[Abstract]
4. ((((((Covid-19[Title]) OR SARS-CoV-2[Title]) OR Coronavirus[Title]) OR 2019 nCoV[Title]) AND Prophylaxis[Body - All Words]) AND Homoharringtonine[Body - All Words]) NOT Review[Abstract]
5. ((((((Covid-19[Title]) OR SARS-CoV-2[Title]) OR Coronavirus[Title]) OR 2019 nCoV[Title]) AND Prophylaxis[Body - All Words]) AND Oritavancin[Body - All Words]) NOT Review[Abstract]
6. ((((((Covid-19[Title]) OR SARS-CoV-2[Title]) OR Coronavirus[Title]) OR 2019 nCoV[Title]) AND Prophylaxis[Body - All Words]) AND Telavancin[Body - All Words]) NOT Review[Abstract]
7. ((((((Covid-19[Title]) OR SARS-CoV-2[Title]) OR Coronavirus[Title]) OR 2019 nCoV[Title]) AND Prophylaxis[Body - All Words]) AND Clomipramine[Body - All Words]) NOT Review[Abstract]
8. ((((((Covid-19[Title]) OR SARS-CoV-2[Title]) OR Coronavirus[Title]) OR 2019 nCoV[Title]) AND Prophylaxis[Body - All Words]) AND Dasatinib[Body - All Words]) NOT Review[Abstract]
9. ((((((Covid-19[Title]) OR SARS-CoV-2[Title]) OR Coronavirus[Title]) OR 2019 nCoV[Title]) AND Prophylaxis[Body - All Words]) AND Emetine[Body - All Words]) NOT Review[Abstract]
10. ((((((Covid-19[Title]) OR SARS-CoV-2[Title]) OR Coronavirus[Title]) OR 2019 nCoV[Title]) AND Prophylaxis[Body - All Words]) AND Toremfene[Body - All Words]) NOT Review[Abstract]
11. ((((((Covid-19[Title]) OR SARS-CoV-2[Title]) OR Coronavirus[Title]) OR 2019 nCoV[Title]) AND Prophylaxis[Body - All Words]) AND Cepharanthine[Body - All Words]) NOT Review[Abstract]
12. ((((((Covid-19[Title]) OR SARS-CoV-2[Title]) OR Coronavirus[Title]) OR 2019 nCoV[Title]) AND Prophylaxis[Body - All Words]) AND Promethazine[Body - All Words]) NOT Review[Abstract]
13. ((((((Covid-19[Title]) OR SARS-CoV-2[Title]) OR Coronavirus[Title]) OR 2019 nCoV[Title]) AND Prophylaxis[Body - All Words]) AND Imatinib[Body - All Words]) NOT Review[Abstract]
14. ((((((Covid-19[Title]) OR SARS-CoV-2[Title]) OR Coronavirus[Title]) OR 2019 nCoV[Title]) AND Prophylaxis[Body - All Words]) AND Indomethacin[Body - All Words]) NOT Review[Abstract]
15. ((((((Covid-19[Title]) OR SARS-CoV-2[Title]) OR Coronavirus[Title]) OR 2019 nCoV[Title]) AND Prophylaxis[Body - All Words]) AND Tamoxifen[Body - All Words]) NOT Review[Abstract]

16. ((((((Covid-19[Title]) OR SARS-CoV-2[Title]) OR Coronavirus[Title]) OR 2019 nCoV[Title]) AND Prophylaxis[Body - All Words]) AND Amodiaquine[Body - All Words]) NOT Review[Abstract]
17. ((((((Covid-19[Title]) OR SARS-CoV-2[Title]) OR Coronavirus[Title]) OR 2019 nCoV[Title]) AND Prophylaxis[Body - All Words]) AND Luteolin[Body - All Words]) NOT Review[Abstract]
18. ((((((Covid-19[Title]) OR SARS-CoV-2[Title]) OR Coronavirus[Title]) OR 2019 nCoV[Title]) AND Prophylaxis[Body - All Words]) AND Niclosamide[Body - All Words]) NOT Review[Abstract]
19. ((((((Covid-19[Title]) OR SARS-CoV-2[Title]) OR Coronavirus[Title]) OR 2019 nCoV[Title]) AND Prophylaxis[Body - All Words]) AND Emodin[Body - All Words]) NOT Review[Abstract]
20. ((((((Covid-19[Title]) OR SARS-CoV-2[Title]) OR Coronavirus[Title]) OR 2019 nCoV[Title]) AND Prophylaxis[Body - All Words]) AND Gemcitabine[Body - All Words]) NOT Review[Abstract]
21. ((((((Covid-19[Title]) OR SARS-CoV-2[Title]) OR Coronavirus[Title]) OR 2019 nCoV[Title]) AND Prophylaxis[Body - All Words]) AND Ivermectin[Body - All Words]) NOT Review[Abstract]
22. ((((((Covid-19[Title]) OR SARS-CoV-2[Title]) OR Coronavirus[Title]) OR 2019 nCoV[Title]) AND Prophylaxis[Body - All Words]) AND Teicoplanin[Body - All Words]) NOT Review[Abstract]
23. ((((((Covid-19[Title]) OR SARS-CoV-2[Title]) OR Coronavirus[Title]) OR 2019 nCoV[Title]) AND Prophylaxis[Body - All Words]) AND Mefloquine[Body - All Words]) NOT Review[Abstract]
24. ((((((Covid-19[Title]) OR SARS-CoV-2[Title]) OR Coronavirus[Title]) OR 2019 nCoV[Title]) AND Prophylaxis[Body - All Words]) AND Chlorpromazine[Body - All Words]) NOT Review[Abstract]
25. ((((((Covid-19[Title]) OR SARS-CoV-2[Title]) OR Coronavirus[Title]) OR 2019 nCoV[Title]) AND Prophylaxis[Body - All Words]) AND Amiodarone[Body - All Words]) NOT Review[Abstract]
26. ((((((Covid-19[Title]) OR SARS-CoV-2[Title]) OR Coronavirus[Title]) OR 2019 nCoV[Title]) AND Prophylaxis[Body - All Words]) AND Glycyrrhizin[Body - All Words]) NOT Review[Abstract]
27. ((((((Covid-19[Title]) OR SARS-CoV-2[Title]) OR Coronavirus[Title]) OR 2019 nCoV[Title]) AND Prophylaxis[Body - All Words]) AND Nelfinavir[Body - All Words]) NOT Review[Abstract]
28. ((((((Covid-19[Title]) OR SARS-CoV-2[Title]) OR Coronavirus[Title]) OR 2019 nCoV[Title]) AND Prophylaxis[Body - All Words]) AND Camostat[Body - All Words]) NOT Review[Abstract]
29. ((((((Covid-19[Title]) OR SARS-CoV-2[Title]) OR Coronavirus[Title]) OR 2019 nCoV[Title]) AND Prophylaxis[Body - All Words]) AND BCX4430[Body - All Words]) OR Galidesivir[Body - All Words]) NOT Review[Abstract]
30. ((((((Covid-19[Title]) OR SARS-CoV-2[Title]) OR Coronavirus[Title]) OR 2019 nCoV[Title]) AND Prophylaxis[Body - All Words]) AND Ribavirin[Body - All Words]) NOT Review[Abstract]
31. ((((((Covid-19[Title]) OR SARS-CoV-2[Title]) OR Coronavirus[Title]) OR 2019 nCoV[Title]) AND Prophylaxis[Body - All Words]) AND Remdesivir[Body - All Words]) NOT Review[Abstract]

32. (((((((Covid-19[Title]) OR SARS-CoV-2[Title]) OR Coronavirus[Title]) OR 2019 nCoV[Title]) AND Prophylaxis[Body - All Words]) AND Arbidol[Body - All Words])OR Umifenovir[Body - All Words])NOT Review[Abstract]
33. (((((((Covid-19[Title]) OR SARS-CoV-2[Title]) OR Coronavirus[Title]) OR 2019 nCoV[Title]) AND Prophylaxis[Body - All Words]) AND Lopinavir[Body - All Words]) NOT Review[Abstract]
34. (((((((Covid-19[Title]) OR SARS-CoV-2[Title]) OR Coronavirus[Title]) OR 2019 nCoV[Title]) AND Prophylaxis[Body - All Words]) AND Chloroquine[Body - All Words]) NOT Review[Abstract]
35. (((((((Covid-19[Title]) OR SARS-CoV-2[Title]) OR Coronavirus[Title]) OR 2019 nCoV[Title]) AND Prophylaxis[Body - All Words]) AND Hydroxychloroquine[Body - All Words]) NOT Review[Abstract]
36. (((((((Covid-19[Title]) OR SARS-CoV-2[Title]) OR Coronavirus[Title]) OR 2019 nCoV[Title]) AND Prophylaxis[Body - All Words]) AND umifenovir[Body - All Words]) NOT Review[Abstract]
37. (((((((Covid-19[Title]) OR SARS-CoV-2[Title]) OR Coronavirus[Title]) OR 2019 nCoV[Title]) AND Prophylaxis[Body - All Words]) AND Tenofovir[Body - All Words]) NOT Review[Abstract]

**Scopus:**

38. ABS (Prophylaxis OR prophylactic AND pre-exposure” AND COVID-19 OR Sars-Cov-2)
39. ABS (Chemoprophylaxis AND pre-exposure AND COVID-19 OR Sars-Cov-2)
40. ABS (repurposed AND prophylaxis AND covid-19 OR sars-cov-2)
41. ABS (chemoprophylaxis OR prophylaxis AND strategies AND clinical AND trials AND covid-19 OR sars-cov-2)
42. ABS (anti-sars-cov-2 OR anti-covid-19 AND in vitro)
43. ABS (prophylaxis AND antiviral AND therapy AND covid-19 OR sars-cov-2)
44. ABS (prophylaxis OR prevention AND covid-19 OR sars-cov-2 AND "in vitro" OR "in cells" OR "human testing")
45. ABS (repurposed AND chemoprophylaxis AND covid-19 OR sars-cov-2)

| <b>Criterion</b>                 |                                                                                                                                                                                                                                                                                                            |
|----------------------------------|------------------------------------------------------------------------------------------------------------------------------------------------------------------------------------------------------------------------------------------------------------------------------------------------------------|
| Languages                        | English                                                                                                                                                                                                                                                                                                    |
| Sources                          | PudMed and Scopus                                                                                                                                                                                                                                                                                          |
| Kind of study                    | Data Articles and Research Articles                                                                                                                                                                                                                                                                        |
| Initial selection                | Based on the title, abstract and keywords.                                                                                                                                                                                                                                                                 |
| Final selection                  | Based on the inclusion and exclusion criteria.                                                                                                                                                                                                                                                             |
| Inclusion and exclusion criteria | <p>Inclusion:<br/>Articles in English language and discuss drugs with prophylactic potential for COVID 19.</p> <p>Exclusion:<br/>- Review articles, which are not aligned with the object of study, case study, clinical guidelines, research strategies, short communications and unfinished studies.</p> |
| Data extraction strategy         | Drugs used, testing phases (I, II and III), drug efficacy, half-life, number of patients or cells used in the tests, drug toxicity, interactions between drugs and side effects.                                                                                                                           |

|                    |                                                                        |
|--------------------|------------------------------------------------------------------------|
| Data summarization | The collected data will be demonstrated in tables, figures and graphs. |
|--------------------|------------------------------------------------------------------------|
